# Supplementary material for: Association Between Greenness Surrounding Schools and Kindergartens and Attention-Deficit/Hyperactivity Disorder in Children in China
Source: PubMed Central journal article supplement (PMC6991306; doi:10.1001/jamanetworkopen.2019.17862), 2019-12-18

## Supplementary Online Content

Yang B-Y, Zeng X-W, Markevych I, et al. Association between greenness surrounding schools and kindergartens and attention-deficit/hyperactivity disorder in children in China. *JAMA Netw Open*. 2019;2(12):e1917862. doi:10.1001/jamanetworkopen.2019.17862

**eTable 1.** Summary of Published Human Studies on Greenness and Attention-Deficit/Hyperactivity Disorder (ADHD) or ADHD Symptoms

**eTable 2.** Distributions and Intercorrelations for Greenness Metrics

**eTable 3.** Associations Between Quantile Greenness Metrics and Attention-Deficit/Hyperactivity Disorder (ADHD) Symptoms

**eTable 4.** Associations Between per 0.1-Unit Greater Greenness Metrics and Subtype of Attention-Deficit/Hyperactivity Disorder (ADHD) Symptoms

**eTable 5.** Associations Between per 0.1-Unit Greater Greenness Metrics and Attention-Deficit/Hyperactivity Disorder (ADHD) Symptoms After Additional Adjustment for Smoking and Drinking During Pregnancy, Breastfeeding, Preterm Birth, Birth Weight, and Number of Siblings at Birth

**eTable 6.** Associations Between per 0.1-Unit Greater Greenness Metrics and Attention-Deficit/Hyperactivity Disorder (ADHD) Symptoms After Excluding Children With Existing Disorders

**eTable 7.** Associations of per 0.1-Unit Greater Greenness Metrics With Attention-Deficit/Hyperactivity Disorder (ADHD) Symptoms Measured by C-ASQ Score

**eFigure.** Directed Acyclic Graph for the Association Between Greenness and Attention-Deficit/Hyperactivity Disorder (ADHD) Symptoms, Created With the Help of Dagitty.net

This supplementary material has been provided by the authors to give readers additional information about their work.

**eTable 1. Summary of Published Human Studies on Greenness and Attention-Deficit/Hyperactivity Disorder (ADHD) or ADHD Symptoms**

| Authors, publication year [reference] | Study design                   | Study participants                                                                        | Outcome metrics                                                                                                                                           | Exposure metrics                                                                                                                                 | Main findings                                                                                                                                                                                                                                   |
|---------------------------------------|--------------------------------|-------------------------------------------------------------------------------------------|-----------------------------------------------------------------------------------------------------------------------------------------------------------|--------------------------------------------------------------------------------------------------------------------------------------------------|-------------------------------------------------------------------------------------------------------------------------------------------------------------------------------------------------------------------------------------------------|
| Taylor and Kuo, 2009                  | Single-blind controlled trials | 17 children aged 7-12 years with diagnosed ADHD in the United States                      | Concentration measured using Digit Span Backwards                                                                                                         | Walk in park, downtown, or neighborhood.                                                                                                         | Walking in park was associated with better concentration of ADHD children compared to children walking in downtown or neighborhood.                                                                                                             |
| Kuo and Taylor, 2004                  | Cross-sectional study          | 452 children aged 5-18 years with diagnosed ADHD in the United States                     | Diagnostic and Statistical Manual of Mental Disorders, Fourth Edition (ADHD/DSM-IV)                                                                       | Forty-nine survey items representing the broad range of activities, physical settings, and social contexts children experience outside of school | Greener outdoor settings reduce presence of ADHD symptoms in children. Sex, age, income, community type, and geographical region did not modify the association.                                                                                |
| Amoly et al., 2014                    | Cross-sectional study          | 2111 schoolchildren (7-10 years of age) from Barcelona                                    | ADHD evaluated by Strengths and Difficulties Questionnaires (SDQ) and Diagnostic and Statistical Manual of Mental Disorders, Fourth Edition (ADHD/DSM-IV) | Time spent playing in green spaces; residential surrounding greenness (NDVI), and residential proximity to a major green space.                  | There exist significant and inverse associations of ADHD symptoms scores with residential greenness, but not with residential proximity to major green space. School greenness was not associated with ADHD symptoms.                           |
| Markevych et al. 2014                 | Cross-sectional study          | 1932 Children and adolescents (10 years of age) from two German cohorts                   | ADHD symptoms assessed using the SDQ                                                                                                                      | Distance to the nearest urban green space                                                                                                        | The distance between residence and the nearest urban green space was positively associated with the odds of hyperactivity/inattention symptoms, and sex modified the association.                                                               |
| Balseviciene et al. 2014              | Cohort study                   | 1468 mothers and their 4- to 6- year-old children living in the city of Kaunas, Lithuania | Emotional and behavioral problems assessed using the SDQ (ADHD symptoms)                                                                                  | Proximity to city parks and residential greenness                                                                                                | Farther distance from city parks was associated with hyperactivity in children whose mothers had a lower education levels, but not in children whose mothers had a higher education levels. No significant association was observed or NDVI and |

|                       |                       |                                                                                                                                                                                                                                    |                                                                                                                                                 |                                                                                                                          |                                                                                                                              |
|-----------------------|-----------------------|------------------------------------------------------------------------------------------------------------------------------------------------------------------------------------------------------------------------------------|-------------------------------------------------------------------------------------------------------------------------------------------------|--------------------------------------------------------------------------------------------------------------------------|------------------------------------------------------------------------------------------------------------------------------|
|                       |                       |                                                                                                                                                                                                                                    |                                                                                                                                                 |                                                                                                                          | hyperactivity.                                                                                                               |
| Dadvand et al. 2017   | Cohort study          | Two prospective birth cohorts from Spain during 2003-2013. Participants were followed at pregnancy, 2y, 4y, or 5y, and 7 y of age. The sample size was 978 for Attentional Network Test or 888 for Conners' Kiddie Continuous Test | Attention assessed using Conners Kiddie Continuous Performance Test and Attentional Network Task [sic]                                          | Residential greenness was assessed using two satellite-based indices of greenness: NDVI and vegetation continuous fields | Higher residential greenness levels were associated with better scores on tests of attention.                                |
| Markevych et al. 2018 | Cohort study          | 66,823 children (aged 10-14 years) residing in Germany since 2005                                                                                                                                                                  | ADHD incidence was diagnosed by at least one outpatient ICD-10-GM F90 by a child/adolescent psychiatrist, neuropsychiatrist, or psychotherapist | NDVI                                                                                                                     | An increase of 0.1-unit in NDVI decreased the relative risk of ADHD by a factor of 0.82 (95% confidence interval: 0.68-0.98) |
| Lee et al., 2019      | Cross-sectional study | 1817 Korean children (aged 7-17 years) and adolescents from 2012 to 2013                                                                                                                                                           | ADHD was assessed using the Child Behavior Checklist                                                                                            | Residential greenness evaluated using modified soil-adjusted vegetation index                                            | A significantly lower score on ADHD was associated with highly modified soil-adjusted vegetation index levels.               |

Abbreviations: ADHD, attention deficit hyperactivity disorder; SDQ, Strengths and Difficulties Questionnaires; ADHD/DSM-IV, ADHD/Diagnostic and Statistical Manual of Mental Disorders, Fourth Edition.

**eTable 2. Distributions and Intercorrelations for Greenness Metrics**

| Greenness              | Statistics          |       |      |             | Spearman Correlation Coefficient |                       |                        |                       |                       |                        |
|------------------------|---------------------|-------|------|-------------|----------------------------------|-----------------------|------------------------|-----------------------|-----------------------|------------------------|
|                        | Median (IQR)        | Min   | Max  | Mean (SD)   | NDVI <sub>100-m</sub>            | NDVI <sub>500-m</sub> | NDVI <sub>1000-m</sub> | SAVI <sub>100-m</sub> | SAVI <sub>500-m</sub> | SAVI <sub>1000-m</sub> |
| NDVI <sub>100-m</sub>  | 0.27 (0.21 to 0.38) | -0.13 | 0.82 | 0.31 (0.16) | 1                                | 0.83 <sup>a</sup>     | 0.70 <sup>a</sup>      | 0.99 <sup>a</sup>     | 0.83 <sup>a</sup>     | 0.70 <sup>a</sup>      |
| NDVI <sub>500-m</sub>  | 0.29 (0.23 to 0.38) | -0.09 | 0.77 | 0.31 (0.14) |                                  | 1                     | 0.93 <sup>a</sup>      | 0.81 <sup>a</sup>     | 0.99 <sup>a</sup>     | 0.92 <sup>a</sup>      |
| NDVI <sub>1000-m</sub> | 0.28 (0.23 to 0.36) | 0.05  | 0.68 | 0.31 (0.12) |                                  |                       | 1                      | 0.70 <sup>a</sup>     | 0.93 <sup>a</sup>     | 0.99 <sup>a</sup>      |
| SAVI <sub>100-m</sub>  | 0.15 (0.11 to 0.22) | -0.02 | 0.50 | 0.18 (0.10) |                                  |                       |                        | 1                     | 0.83 <sup>a</sup>     | 0.72 <sup>a</sup>      |
| SAVI <sub>500-m</sub>  | 0.16 (0.12 to 0.21) | 0.00  | 0.47 | 0.18 (0.09) |                                  |                       |                        |                       | 1                     | 0.94 <sup>a</sup>      |
| SAVI <sub>1000-m</sub> | 0.16 (0.13 to 0.20) | 0.05  | 0.42 | 0.18 (0.08) |                                  |                       |                        |                       |                       | 1                      |

Abbreviations: IQR, interquartile range; Min, minimum; Max, maximum; NDVI, normalized difference vegetation index; SAVI, soil adjusted vegetation index; SD, standard deviation.

<sup>a</sup> $P < 0.05$  for correlation.

**eTable 3. Associations Between Quantile Greenness Metrics and Attention-Deficit/Hyperactivity Disorder (ADHD) Symptoms (n = 59 754)**

| Greenness Metrics          | Adjusted Model <sup>a</sup> |         |                   |
|----------------------------|-----------------------------|---------|-------------------|
|                            | OR (95% CI)                 | P Value | P Value for Trend |
| NDVI <sub>500-m</sub>      |                             |         | < .001            |
| Q <sub>1</sub> (<0.23)     | Ref.                        |         |                   |
| Q <sub>2</sub> (0.23-0.29) | 0.89 (0.80 to 0.99)         | .03     |                   |
| Q <sub>3</sub> (0.30-0.38) | 0.68 (0.60 to 0.76)         | < .001  |                   |
| Q <sub>4</sub> (>0.38)     | 0.63 (0.55 to 0.71)         | < .001  |                   |
| SAVI <sub>500-m</sub>      |                             |         | < .001            |
| Q <sub>1</sub> (<0.12)     | Ref.                        |         |                   |
| Q <sub>2</sub> (0.12-0.16) | 0.92 (0.83 to 1.02)         | .11     |                   |
| Q <sub>3</sub> (0.17-0.21) | 0.70 (0.63 to 0.78)         | < .001  |                   |
| Q <sub>4</sub> (>0.21)     | 0.64 (0.57 to 0.73)         | < .001  |                   |

Abbreviations: ADHD, attention deficit hyperactivity disorder; CI, confidence interval; NDVI, normalized difference vegetation index; OR, odds ratio; SAVI, soil adjusted vegetation index.

<sup>a</sup>Adjusted for age, gender, parental education level, household income level, type of home district, and dog ownership.

**eTable 4. Associations Between per 0.1-Unit Greater Greenness Metrics and Subtype of Attention-Deficit/Hyperactivity Disorder (ADHD) Symptoms (N = 59 754)**

| ADHD subtype          | Adjusted Model <sup>a</sup> | P Value |
|-----------------------|-----------------------------|---------|
|                       | OR (95% CI)                 |         |
| ADHD-HI               |                             |         |
| NDVI <sub>500-m</sub> | 0.87 (0.80 to 0.95)         | .002    |
| SAVI <sub>500-m</sub> | 0.81 (0.71 to 0.93)         | .003    |
| ADHD-I                |                             |         |
| NDVI <sub>500-m</sub> | 0.87 (0.83 to 0.91)         | <.001   |
| SAVI <sub>500-m</sub> | 0.80 (0.74 to 0.87)         | <.001   |
| ADHD-C                |                             |         |
| NDVI <sub>500-m</sub> | 0.88 (0.79 to 0.97)         | .01     |
| SAVI <sub>500-m</sub> | 0.82 (0.70 to 0.97)         | .02     |

Abbreviations: ADHD, attention deficit hyperactivity disorder; ADHD-C, ADHD symptoms including both inattention and hyperactivity-impulsivity symptoms; ADHD-HI, ADHD symptoms including predominantly hyperactivity-impulsivity; ADHD-I, symptoms including predominantly inattention; CI, confidence interval; NDVI, normalized difference vegetation index; OR, odds ratio; SAVI, soil adjusted vegetation index.

<sup>a</sup>Adjusted for age, gender, parental education level, household income level, type of home district, and dog ownership.

**eTable 5. Associations Between per 0.1-Unit Greater Greenness Metrics and Attention-Deficit/Hyperactivity Disorder (ADHD) Symptoms After Additional Adjustment for Smoking and Drinking During Pregnancy, Breastfeeding, Preterm Birth, Birth Weight, and Number of Siblings at Birth (N = 59 754)**

| Models                                              | OR (95% CI)         | P Value |
|-----------------------------------------------------|---------------------|---------|
| <b>NDVI<sub>500-m</sub></b>                         |                     |         |
| Main model <sup>a</sup> + smoking during pregnancy  | 0.87 (0.83 to 0.91) | <.001   |
| Main model <sup>a</sup> + drinking during pregnancy | 0.87 (0.83 to 0.91) | <.001   |
| Main model <sup>a</sup> + breastfeeding             | 0.87 (0.83 to 0.91) | <.001   |
| Main model <sup>a</sup> + preterm birth             | 0.87 (0.83 to 0.91) | <.001   |
| Main model <sup>a</sup> + birth weight              | 0.87 (0.83 to 0.91) | <.001   |
| Main model <sup>a</sup> + number of siblings        | 0.86 (0.83 to 0.90) | <.001   |
| <b>SAVI<sub>500-m</sub></b>                         |                     |         |
| Main model <sup>a</sup> + smoking during pregnancy  | 0.80 (0.74 to 0.86) | <.001   |
| Main model <sup>a</sup> + drinking during pregnancy | 0.80 (0.74 to 0.86) | <.001   |
| Main model <sup>a</sup> + breastfeeding             | 0.80 (0.74 to 0.86) | <.001   |
| Main model <sup>a</sup> + preterm birth             | 0.80 (0.75 to 0.86) | <.001   |
| Main model <sup>a</sup> + birth weight              | 0.80 (0.75 to 0.86) | <.001   |
| Main model <sup>a</sup> + number of siblings        | 0.80 (0.74 to 0.86) | <.001   |

Abbreviations: ADHD, attention deficit hyperactivity disorder; CI, confidence interval; NDVI, normalized difference vegetation index; OR, odds ratio; SAVI, soil adjusted vegetation index.

<sup>a</sup>Adjusted for age, gender, parental education level, household income level, type of home district, and dog ownership.

**eTable 6. Associations Between per 0.1-Unit Greater Greenness Metrics and Attention-Deficit/Hyperactivity Disorder (ADHD) Symptoms After Excluding Children With Existing Disorders**

| Models                                                 | No.    | OR (95% CI) <sup>a</sup> | P Value |
|--------------------------------------------------------|--------|--------------------------|---------|
| <b>NDVI<sub>500-m</sub></b>                            |        |                          |         |
| Excluding children with allergic diseases <sup>b</sup> | 48 187 | 0.86 (0.82 to 0.91)      | <.001   |
| Excluding children with congenital heart diseases      | 59 493 | 0.86 (0.82 to 0.91)      | <.001   |
| Excluding children with preterm birth                  | 56 537 | 0.86 (0.82 to 0.91)      | <.001   |
| Excluding children with low birth weight               | 57 567 | 0.87 (0.83 to 0.91)      | <.001   |
| <b>SAVI<sub>500-m</sub></b>                            |        |                          |         |
| Excluding children with allergic diseases <sup>b</sup> | 48 187 | 0.80 (0.74 to 0.86)      | <.001   |
| Excluding children with congenital heart diseases      | 59 493 | 0.80 (0.74 to 0.86)      | .002    |
| Excluding children with preterm birth                  | 56 537 | 0.80 (0.74 to 0.86)      | <.001   |
| Excluding children with low birth weight               | 57 567 | 0.80 (0.74 to 0.87)      | <.001   |

Abbreviations: ADHD, attention deficit hyperactivity disorder; CI, confidence interval; NDVI, normalized difference vegetation index; OR, odds ratio; SAVI, soil adjusted vegetation index.

<sup>a</sup>Adjusted for age, gender, parental education level, household income level, type of home district, and dog ownership.

<sup>b</sup>Allergic diseases included asthma, eczema, and allergic conjunctivitis.



**eTable 7. Associations of per 0.1-Unit Greater Greenness Metrics With Attention-Deficit/Hyperactivity Disorder (ADHD) Symptoms Measured by C-ASQ Score (N = 59 754)**

| Greenness Metrics     | Adjusted Model <sup>a</sup> |                |
|-----------------------|-----------------------------|----------------|
|                       | OR (95% CI)                 | <i>P</i> Value |
| NDVI <sub>500-m</sub> | 0.85 (0.79 to 0.90)         | <. 001         |
| SAVI <sub>500-m</sub> | 0.77 (0.70 to 0.86)         | <. 001         |

Abbreviations: ADHD, attention deficit hyperactivity disorder; C-ASQ, the Conners Abbreviated Symptom Questionnaire; CI, confidence interval; NDVI, normalized difference vegetation index; OR, odds ratio; SAVI, soil adjusted vegetation index.

<sup>a</sup>Adjusted for age, gender, parental education level, household income level, type of district, and dog ownership.

**eFigure. Directed Acyclic Graph for the Association Between Greenness and Attention-Deficit/Hyperactivity Disorder (ADHD) Symptoms, Created With the Help of Dagitty.net (www.dagitty.net)**

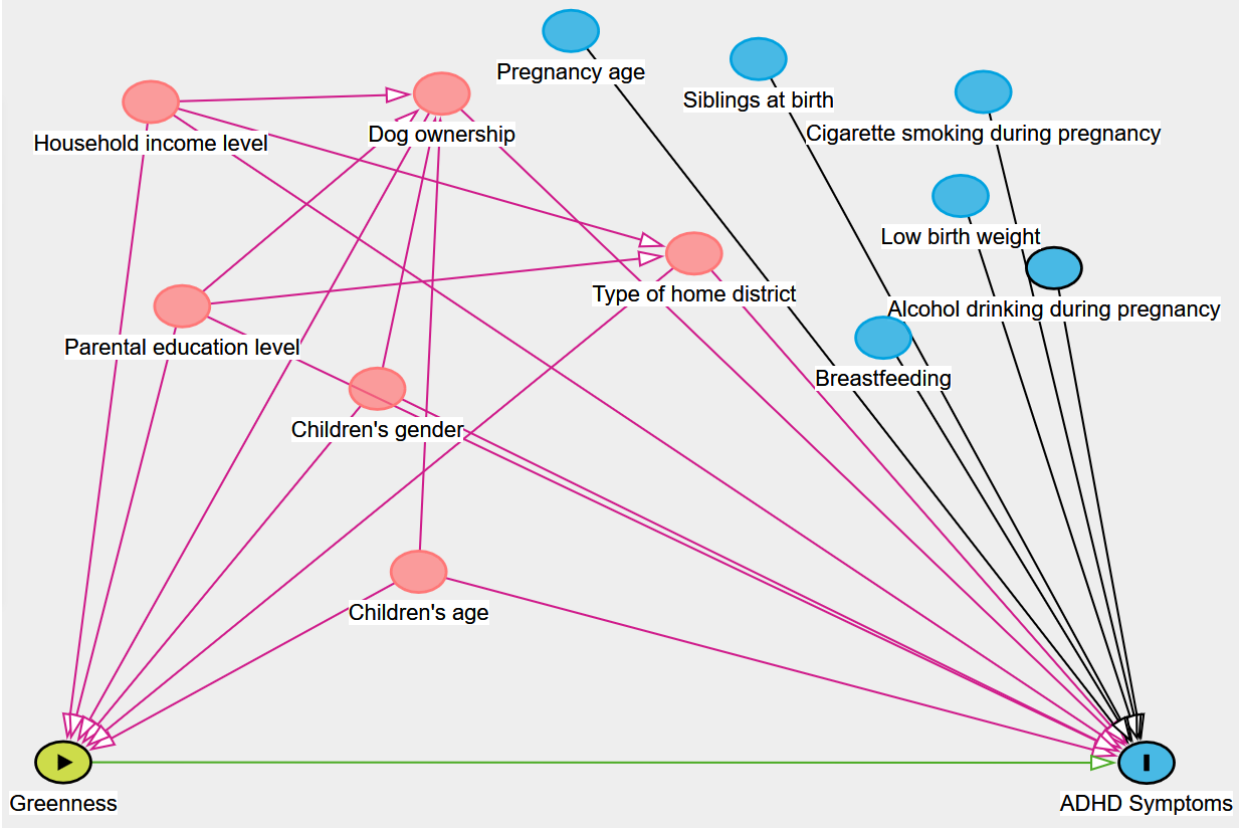

Supplement: jamanetwopen-2-e1917862-s001.pdf [file jamanetwopen-2-e1917862-s001.pdf]
